# Supplementary material for: Molecular Epidemiology, Antimicrobial Surveillance, and PK/PD Analysis to Guide the Treatment of Neisseria gonorrhoeae Infections
Source: MDPI journal article supplement (doi:10.3390/pharmaceutics13101699), 2021-10-15
Supplement: s1 [file s1]

# Supplementary Materials: Molecular Epidemiology, Antimicrobial Surveillance, and PK/PD Analysis to Guide the Treatment of *Neisseria gonorrhoeae* Infections

Rodrigo Alonso, Ainara Rodríguez-Achaerandio, Amaia Aguirre-Quinonero, Aitor Artetxe, Ilargi Martínez-Ballesteros, Alicia Rodríguez-Gascón, Javier Garaizar and Andrés Canut

## Pharmacokinetic/Pharmacodynamic indexes estimation

Five thousand-subject Monte Carlo simulations with Oracle®Crystal Ball Fusion Edition v.11.1.2.3.500 (Oracle USA Inc., Redwood City, CA, USA) was used to estimate the PK/PD indexes, indicative of the probability of target success. The output consisted of a probability distribution and specific confidence intervals (CIs) over particular  $fT_{>MIC}$  or  $AUC_{0-\infty}/MIC$ , and MIC values, according to the European Committee on Antimicrobial Susceptibility Testing (EUCAST) approach [1]. Moreover, the PTA, defined as the probability that a specific value of a PK/PD index associated with the efficacy of the antimicrobial treatment is achieved at a certain MIC [2] was estimated. The CFR, understood as the expected population PTA for a specific antimicrobial dose and a specific population of microorganisms, was also calculated. It allowed for an estimation of the proportion of the population achieving a certain PK/PD value, given the Monte Carlo simulation and the MIC distribution of the target microorganism [2].

Table S1 shows the PK/PD index and the pharmacokinetic parameters used for simulations. Logarithmic transformation was applied to the mean and standard deviation (S.D.) of the pharmacokinetic parameters to normalize their distributions.

**Table S1.** Dose regimen, PK/PD index and pharmacokinetic parameters used for simulations.

|                           | Ciprofloxacin              | Azithromycin                | Ceftriaxone                                        | Cefixime           |
|---------------------------|----------------------------|-----------------------------|----------------------------------------------------|--------------------|
| Dose regimen              | 500 mg<br>single dose, PO  | 1 g, 2 g<br>single dose, PO | 0.25, 0.5, 1 g<br>single dose, IM<br>2 g/day, IV   | 400 mg/day, PO     |
| PK/PD index               | $AUC_{0-\infty}/CMI$ : 125 | $AUC_{0-\infty}/CMI$ : 59.5 | $fT_{>CMI} > 20$ h (IM)<br>$fT_{>CMI} > 60\%$ (IV) | $fT_{>CMI} > 60\%$ |
| $AUC_{0-\infty}$ (mg h/L) | 10.7±2.6                   |                             |                                                    |                    |
| CL/F (L/h)                |                            | 144±39.5                    |                                                    |                    |
| Ke (h <sup>-1</sup> )     |                            |                             | 0.082±0.029                                        | 0.204±0.02         |
| Vd (L)                    |                            |                             | 14.70±4.9 <sup>3</sup>                             | 19±0.03            |
| Fu                        |                            |                             | 0.05                                               | 0.35               |
| F                         |                            |                             | 1                                                  | 0.42±0.045         |
| Ka (h <sup>-1</sup> )     |                            |                             | 1                                                  | 0.55               |
| References                | [3,4]                      | [5,6]                       | [7]                                                | [7]                |

IM: intramuscular; IV: intravenous; PO: oral;  $AUC_{0-\infty}$ : area under the plasma concentration vs time curve in a period of 24 h; CL: clearance; F: bioavailability; Fu: unbound fraction; Ka: absorption constant rate; Ke: elimination constant rate; Vd: volume of distribution.

For ciprofloxacin,  $AUC_{0-\infty}/MIC$  was calculated by using directly the value of  $AUC_{0-\infty}$  published previously, obtained in healthy subjects who received 500 mg of ciprofloxacin as a single oral dose [8].

For azithromycin, the  $AUC_{0-\infty}/MIC$  was calculated as follow:

$$AUC_{24}/MIC = D/CL \cdot MIC$$

Where  $AUC_{0-\infty}$  is the area under the curve plasma concentration-time from 0 to infinity (mg h/L),  $D$  is the daily dose (mg), and  $CL$  the plasma clearance (L/h) [9,10]

For intramuscular administration of ceftriaxone [9],  $fT_{>MIC}$  (h) was calculated by using the following equations:

$$conc = (F \cdot D \cdot K_a \cdot f_u) / (V_d \cdot (K_a - K)) \cdot (e^{-K \cdot t} - e^{-K_a \cdot t})$$

where  $F$  is the drug bioavailability,  $D$  is the dose,  $f_u$  is the unbound drug fraction,  $K_a$  is the absorption rate constant,  $V_d$  is the distribution volume,  $K$  is the elimination rate constant.

$$fT_{>MIC} (h) = t_2 - t_1$$

where  $t_1$  and  $t_2$  corresponds to the time at which the drug concentration reaches the MIC in the ascendant and in the elimination phase of the plasma concentration-time curve, respectively [10].

For endovenous administration, the following equation was used [11]:

$$fT_{>MIC} (\%) = \frac{\ln((D \cdot f_u) / (V_d \cdot MIC)) \cdot (1 - e^{-n \cdot K \cdot \tau}) / (1 - e^{-K \cdot \tau})}{K} \cdot 100 / \tau$$

where  $fT_{>MIC} (\%)$  is the proportion of time that the free drug concentration remains above the MIC at steady-state (%),  $\ln$  is the natural logarithm,  $D$  is the dose of antibiotic administered (mg),  $f_u$  is the unbound fraction,  $V_d$  is the distribution volume,  $K$  is the elimination rate constant,  $n$  is the number of administered doses that ensures that the steady state is reached (10 doses was always selected), and  $\tau$  is the dosing interval.

For cefixime [6], the  $\%fT_{>MIC}$  values were calculated by using the following equations:

$$conc = (F \cdot D \cdot K_a \cdot f_u) / (V_d \cdot (K_a - K)) \cdot \left[ \frac{(1 - e^{-n \cdot K \cdot \tau})}{(1 - e^{-K \cdot \tau})} \cdot e^{-K \cdot t} - \frac{(1 - e^{-(n \cdot K_a - K) \cdot \tau})}{(1 - e^{-(K_a - K) \cdot \tau})} \cdot e^{-K_a \cdot t} \right]$$

where  $F$  is the drug bioavailability,  $D$  is the dose,  $f_u$  is the unbound drug fraction,  $K_a$  is the absorption rate constant,  $V_d$  is the distribution volume,  $K$  is the elimination rate constant,  $n$  is the number of administered doses that ensures that the steady state is reached (10 doses was always selected).

$$fT_{>MIC} (\%) = [(t_2 - t_1) / \tau] \times 100$$

where  $t_1$  and  $t_2$  corresponds to the time at which the drug concentration reaches the MIC in the ascendant and in the elimination phase of the plasma concentration-time curve, respectively [4].

## Results

**Table S2.** Probability of target attainment (PTA) and cumulative fraction of response (CFR) of ciprofloxacin, 500 mg, single dose, oral administration.

| CMI<br>(mg/L) | PTA (%)<br>(AUC <sub>0-∞</sub> /MIC>125) | AUC <sub>0-∞</sub> /MIC |        |         |         |
|---------------|------------------------------------------|-------------------------|--------|---------|---------|
|               |                                          | Mean                    | Median | 92.5%CI | 97.5%CI |
| 0.0015        | 100                                      | 7,135                   | 6,940  | 4,707   | 10,224  |
| 0.002         | 100                                      | 5,351                   | 5,205  | 3,530   | 7,668   |
| 0.003         | 100                                      | 3,567                   | 3,470  | 2,354   | 5,112   |
| 0.004         | 100                                      | 2,676                   | 2,602  | 1,765   | 3,834   |
| 0.006         | 100                                      | 1,784                   | 1,735  | 1,177   | 2,556   |
| 0.008         | 100                                      | 1,338                   | 1,301  | 883     | 1,917   |
| 0.012         | 100                                      | 891                     | 864    | 585     | 1,293   |
| 0.016         | 100                                      | 668                     | 648    | 438     | 970     |
| 0.023         | 100                                      | 465                     | 451    | 305     | 674     |
| 0.125         | 100                                      | 86                      | 83     | 56      | 124     |
| 0.16          | 4                                        | 67                      | 65     | 44      | 97      |
| 0.5           | 0                                        | 21                      | 21     | 14      | 31      |
| 0.75          | 0                                        | 14                      | 14     | 9       | 20      |
| 1             | 0                                        | 11                      | 10     | 7       | 15      |
| 1.5           | 0                                        | 7                       | 7      | 5       | 10      |
| 2             | 0                                        | 5                       | 5      | 4       | 8       |
| 3             | 0                                        | 4                       | 3      | 2       | 5       |
| 4             | 0                                        | 3                       | 3      | 2       | 4       |
| 6             | 0                                        | 2                       | 2      | 1       | 3       |
| 8             | 0                                        | 1                       | 1      | 1       | 2       |
| 12            | 0                                        | 1                       | 1      | 1       | 1       |
| 16            | 0                                        | 1                       | 1      | 0       | 1       |
| 33            | 0                                        | 0                       | 0      | 0       | 0       |
| 64            | 0                                        | 0                       | 0      | 0       | 0       |
| CFR (%)       | 51                                       | 1,708                   | 820    | 0       |         |

PTA: probability of target attainment; CFR: cumulative of fraction of response (population PTA for the MIC distribution).

**Table S3.** Probability of target attainment (PTA) and cumulative fraction of response (CFR) of azithromycin, 1 g, single dose, oral administration.

| CMI<br>(mg/L) | PTA (%)<br>(AUC <sub>0-∞</sub> /MIC>59.5) | AUC <sub>0-∞</sub> /MIC |        |         |         |
|---------------|-------------------------------------------|-------------------------|--------|---------|---------|
|               |                                           | Mean                    | Median | 92.5%CI | 97.5%CI |
| 0.016         | 100                                       | 520                     | 450    | 254     | 991     |
| 0.023         | 100                                       | 362                     | 313    | 177     | 689     |
| 0.032         | 100                                       | 260                     | 225    | 127     | 496     |
| 0.047         | 100                                       | 177                     | 153    | 86      | 337     |
| 0.064         | 97                                        | 130                     | 113    | 63      | 248     |
| 0.094         | 75                                        | 88                      | 77     | 43      | 169     |
| 0.125         | 47                                        | 67                      | 58     | 32      | 127     |
| 0.19          | 16                                        | 44                      | 38     | 21      | 83      |
| 0.25          | 6                                         | 33                      | 29     | 16      | 63      |
| 0.38          | 1                                         | 22                      | 19     | 11      | 42      |
| 0.5           | 1                                         | 17                      | 14     | 8       | 32      |
| 0.75          | 0                                         | 11                      | 10     | 5       | 21      |
| 1             | 0                                         | 8                       | 7      | 4       | 16      |
| 2             | 0                                         | 4                       | 4      | 2       | 8       |
| CFR           | 33                                        | 196                     | 41     | 63      | 6       |

PTA: probability of target attainment; CFR: cumulative of fraction of response (population PTA for the MIC distribution).

**Table S4.** Probability of target attainment (PTA) and cumulative fraction of response (CFR) of azithromycin, 2 g, single dose, oral administration.

| CMI<br>(mg/L) | PTA (%)<br>(AUC <sub>0-∞</sub> /MIC>59.5) | AUC <sub>0-∞</sub> /MIC |        |         |         |
|---------------|-------------------------------------------|-------------------------|--------|---------|---------|
|               |                                           | Mean                    | Median | 92.5%CI | 97.5%CI |
| 0.016         | 100                                       | 100                     | 1041   | 514     | 911     |
| 0.023         | 100                                       | 100                     | 724    | 357     | 634     |
| 0.032         | 100                                       | 100                     | 521    | 257     | 455     |
| 0.047         | 100                                       | 100                     | 355    | 175     | 310     |
| 0.064         | 100                                       | 100                     | 260    | 128     | 228     |
| 0.094         | 100                                       | 100                     | 177    | 87      | 155     |
| 0.125         | 98                                        | 100                     | 133    | 66      | 117     |
| 0.19          | 74                                        | 100                     | 88     | 43      | 77      |
| 0.25          | 47                                        | 100                     | 67     | 33      | 58      |
| 0.38          | 16                                        | 88                      | 44     | 22      | 38      |
| 0.5           | 7                                         | 66                      | 33     | 16      | 29      |
| 0.75          | 1                                         | 28                      | 22     | 11      | 19      |
| 1             | 0                                         | 12                      | 17     | 8       | 15      |
| 2             | 0                                         | 1                       | 8      | 4       | 7       |
| CFR           | 64                                        | 137                     | 84     | 421     | 11      |

PTA: probability of target attainment; CFR: cumulative of fraction of response (population PTA for the MIC distribution).

**Table S5.** Probability of target attainment (PTA) and cumulative fraction of response (CFR) of ceftriaxone, 250 mg, single dose, intramuscular administration.

| CMI<br>(mg/L) | PTA (%)<br>(%fT > 20 h) | %fT (h) |        |         |         |
|---------------|-------------------------|---------|--------|---------|---------|
|               |                         | Mean    | Median | 92.5%CI | 97.5%CI |
| 0.003         | 100                     | 74      | 75     | 42      | 96      |
| 0.004         | 100                     | 72      | 73     | 40      | 96      |
| 0.006         | 100                     | 68      | 66     | 37      | 96      |
| 0.008         | 100                     | 64      | 63     | 35      | 96      |
| 0.012         | 100                     | 60      | 57     | 32      | 96      |
| 0.016         | 100                     | 56      | 53     | 30      | 95      |
| 0.023         | 99                      | 51      | 49     | 27      | 87      |
| 0.032         | 99                      | 47      | 44     | 25      | 80      |
| 0.047         | 97                      | 42      | 39     | 22      | 71      |
| 0.064         | 94                      | 38      | 35     | 20      | 64      |
| 0.094         | 87                      | 32      | 30     | 17      | 55      |
| 0.125         | 77                      | 28      | 26     | 14      | 49      |
| 0.250         | 35                      | 18      | 17     | 8       | 34      |
| 0.5           | 3                       | 8       | 7      | 0       | 19      |
| 1             | 0                       | 1       | 0      | 0       | 0       |
| 2             | 0                       | 0       | 0      | 0       | 0       |
| CFR           | 96                      | 56      | 55     | 20      | 96      |

PTA: probability of target attainment; CFR: cumulative of fraction of response (population PTA for the MIC distribution).

**Table S6.** Probability of target attainment (PTA) and cumulative fraction of response (CFR) of ceftriaxone, 500 mg, single dose, intramuscular administration.

| CMI<br>(mg/L) | PTA (%)<br>(%fT > 20 h) | %fT (h) |        |         |         |
|---------------|-------------------------|---------|--------|---------|---------|
|               |                         | Mean    | Median | 92.5%CI | 97.5%CI |
| 0.003         | 100                     | 79      | 83     | 48      | 96      |
| 0.004         | 100                     | 77      | 79     | 44      | 96      |
| 0.006         | 100                     | 74      | 74     | 43      | 96      |
| 0.008         | 100                     | 71      | 70     | 40      | 96      |
| 0.012         | 100                     | 67      | 65     | 37      | 96      |
| 0.016         | 100                     | 64      | 61     | 35      | 96      |
| 0.023         | 100                     | 60      | 57     | 32      | 96      |
| 0.032         | 100                     | 56      | 52     | 30      | 95      |
| 0.047         | 100                     | 51      | 48     | 27      | 86      |
| 0.064         | 99                      | 47      | 44     | 25      | 79      |
| 0.094         | 97                      | 41      | 39     | 22      | 71      |
| 0.125         | 94                      | 38      | 35     | 20      | 64      |
| 0.250         | 76                      | 28      | 26     | 14      | 49      |
| 0.5           | 34                      | 18      | 17     | 8       | 34      |
| 1             | 4                       | 8       | 7      | 0       | 19      |
| 2             | 0                       | 1       | 0      | 0       | 6       |
| CFR           | 98                      | 64      | 63     | 27      | 96      |

PTA: probability of target attainment; CFR: cumulative of fraction of response (population PTA for the MIC distribution).

**Table S7.** Probability of target attainment (PTA) and cumulative fraction of response (CFR) of ceftriaxone, 1 g, single dose, intramuscular administration.

| CMI<br>(mg/L) | PTA (%)<br>(%fT > 20 h) | %fT (h) |        |         |         |
|---------------|-------------------------|---------|--------|---------|---------|
|               |                         | Mean    | Median | 92.5%CI | 97.5%CI |
| 0.003         | 100                     | 84      | 92     | 52      | 96      |
| 0.004         | 100                     | 82      | 89     | 50      | 96      |
| 0.006         | 100                     | 79      | 83     | 47      | 96      |
| 0.008         | 100                     | 77      | 80     | 45      | 96      |
| 0.012         | 100                     | 74      | 75     | 43      | 96      |
| 0.016         | 100                     | 71      | 71     | 40      | 96      |
| 0.023         | 100                     | 67      | 66     | 37      | 96      |
| 0.032         | 100                     | 64      | 62     | 35      | 96      |
| 0.047         | 100                     | 59      | 57     | 32      | 96      |
| 0.064         | 100                     | 55      | 53     | 30      | 94      |
| 0.094         | 99                      | 50      | 48     | 27      | 85      |
| 0.125         | 99                      | 47      | 44     | 25      | 79      |
| 0.250         | 94                      | 37      | 35     | 19      | 63      |
| 0.5           | 75                      | 28      | 26     | 14      | 48      |
| 1             | 34                      | 18      | 17     | 8       | 32      |
| 2             | 4                       | 8       | 7      | 0       | 19      |
| CFR           | 100                     | 71      | 70     | 32      | 96      |

PTA: probability of target attainment; CFR: cumulative of fraction of response (population PTA for the MIC distribution).



**Table S8.** Probability of target attainment (PTA) and cumulative fraction of response (CFR) of ceftriaxone, 2 g/day, intravenous administration.

| CMI<br>(mg/L) | PTA (%)<br>( $fT_{>MIC} > 60\%$ ) | % $fT_{>MIC}$ |        |         |         |
|---------------|-----------------------------------|---------------|--------|---------|---------|
|               |                                   | Mean          | Median | 92.5%CI | 97.5%CI |
| 0.0030        | 100                               | 100           | 100    | 100     | 100     |
| 0.0040        | 100                               | 100           | 100    | 100     | 100     |
| 0.006         | 100                               | 100           | 100    | 100     | 100     |
| 0.008         | 100                               | 100           | 100    | 100     | 100     |
| 0.012         | 100                               | 100           | 100    | 100     | 100     |
| 0.016         | 100                               | 100           | 100    | 100     | 100     |
| 0.023         | 100                               | 100           | 100    | 100     | 100     |
| 0.032         | 100                               | 100           | 100    | 100     | 100     |
| 0.047         | 100                               | 100           | 100    | 100     | 100     |
| 0.064         | 100                               | 100           | 100    | 100     | 100     |
| 0.094         | 100                               | 100           | 100    | 100     | 100     |
| 0.125         | 100                               | 100           | 100    | 100     | 100     |
| 0.25          | 100                               | 99            | 100    | 100     | 100     |
| 0.5           | 99                                | 98            | 100    | 79      | 100     |
| 1             | 94                                | 91            | 100    | 57      | 100     |
| 2             | 70                                | 75            | 77     | 34      | 100     |
| 4             | 27                                | 45            | 40     | 9       | 100     |
| 8             | 3                                 | 12            | 4      | 0       | 48      |
| 16            | 0                                 | 0             | 0      | 0       | 0       |
| CFR           | 100                               | 100           | 100    | 100     | 100     |

PTA: probability of target attainment; CFR: cumulative of fraction of response (population PTA for the MIC distribution).

**Table S9.** Probability of target attainment (PTA) and cumulative fraction of response (CFR) of cefixime, 400 mg/day, oral administration.

| CMI<br>(mg/L) | PTA (%)<br>( $fT_{>MIC} > 60\%$ ) | %fT <sub>&gt;MIC</sub> |        |         |         |
|---------------|-----------------------------------|------------------------|--------|---------|---------|
|               |                                   | Mean                   | Median | 92.5%CI | 97.5%CI |
| 0.008         | 100                               | 100                    | 100    | 100     | 100     |
| 0.016         | 100                               | 100                    | 100    | 100     | 100     |
| 0.023         | 100                               | 99                     | 100    | 96      | 100     |
| 0.032         | 100                               | 98                     | 100    | 90      | 100     |
| 0.047         | 100                               | 95                     | 97     | 83      | 100     |
| 0.064         | 100                               | 90                     | 91     | 78      | 100     |
| 0.094         | 100                               | 83                     | 83     | 71      | 98      |
| 0.125         | 100                               | 77                     | 77     | 66      | 91      |
| 0.19          | 90                                | 69                     | 68     | 58      | 81      |
| 0.25          | 65                                | 63                     | 62     | 53      | 74      |
| 0.38          | 14                                | 54                     | 53     | 44      | 64      |
| 0.75          | 0                                 | 38                     | 38     | 29      | 47      |
| 1             | 0                                 | 30                     | 30     | 20      | 40      |
| CFR           | 97                                | 97                     | 100    | 77      | 100     |

PTA: probability of target attainment; CFR: cumulative of fraction of response (population PTA for the MIC distribution).

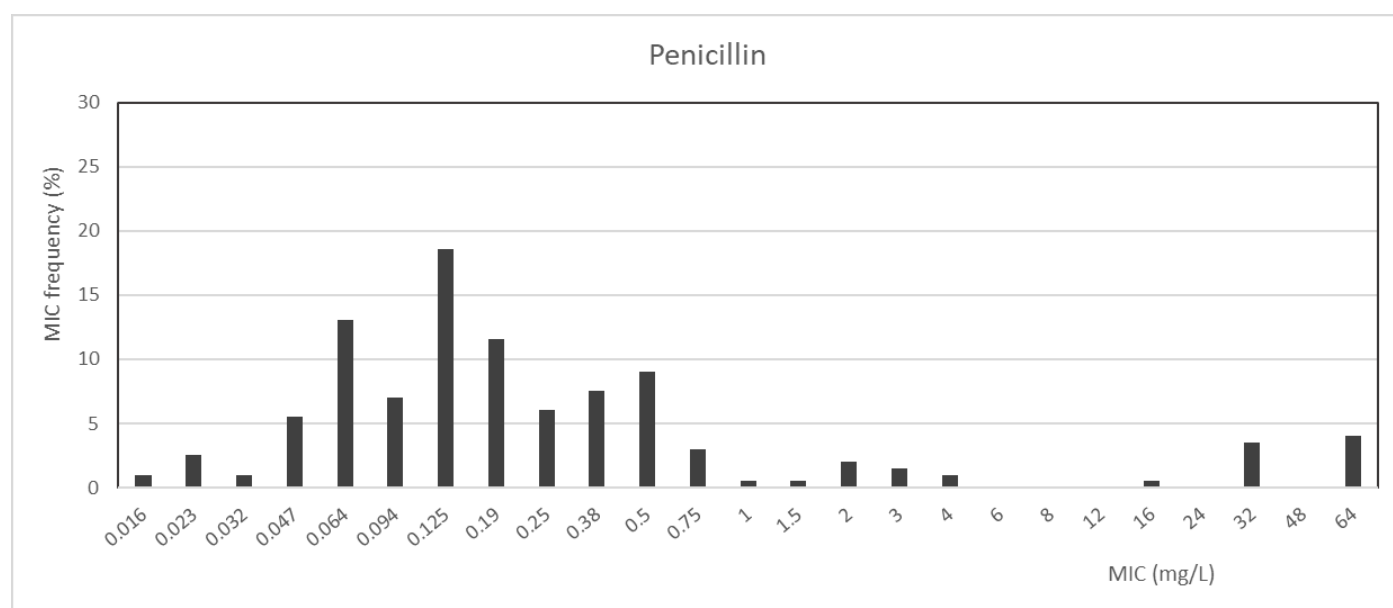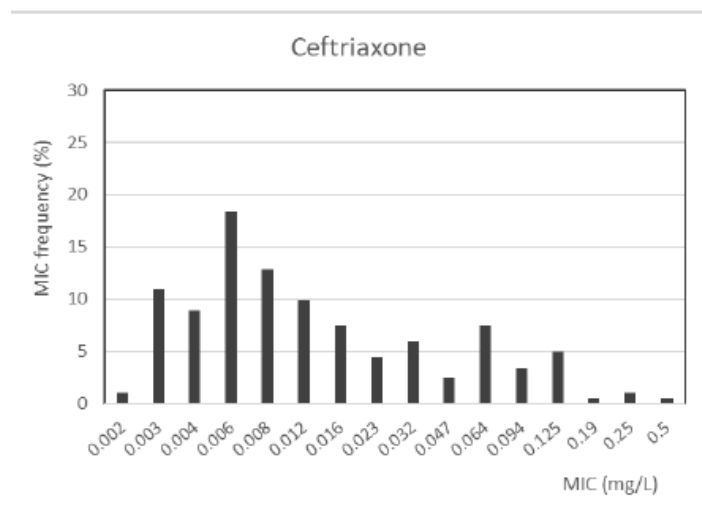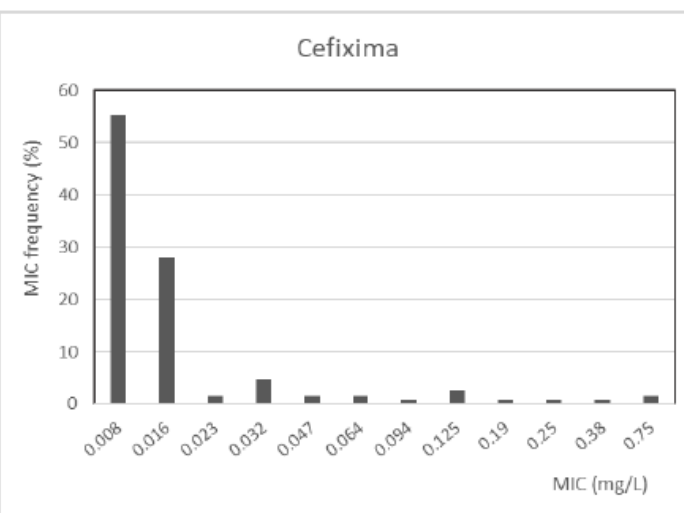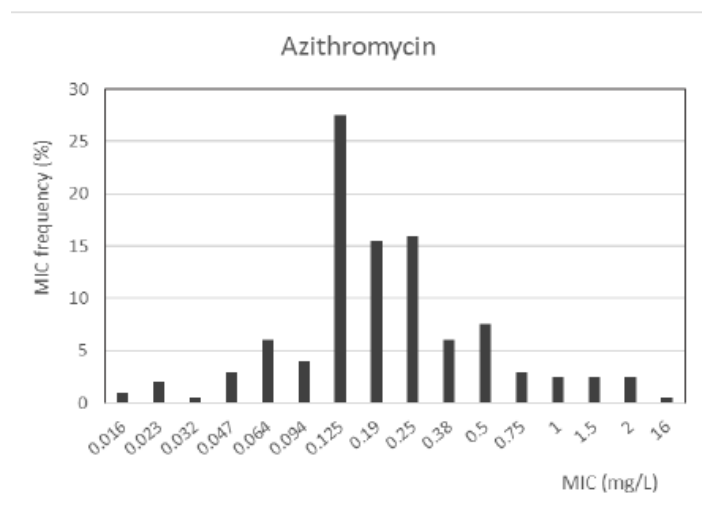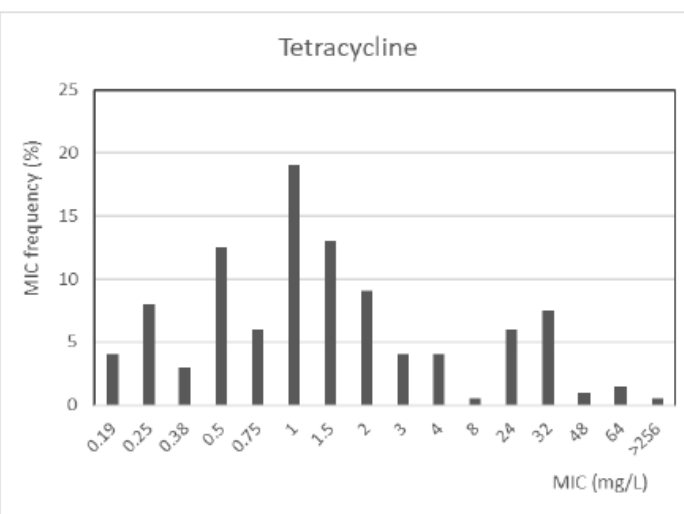

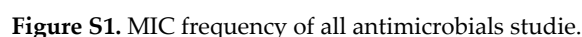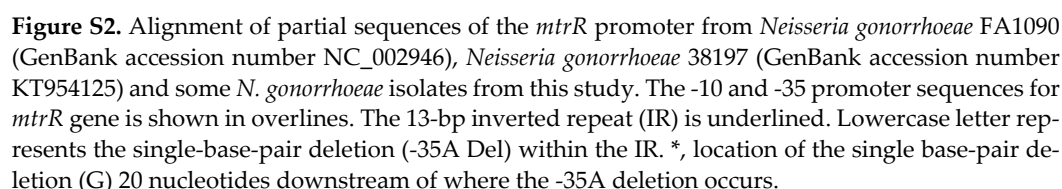

1. Mouton JW, Brown DF, Apfalter P, Cantón R, Giske CG, Ivanova M, et al. The role of pharmacokinetics/pharmacodynamics in setting clinical MIC breakpoints: the EUCAST approach. Clin Microbiol Infect 2012;18:E37-45.
2. Mouton JW, Dudley MN, Cars O, Derendorf H, Drusano GL. Standardization of pharmacokinetic/pharmacodynamic (PK/PD) terminology for anti-infective drugs: an update. J Antimicrob Chemother 2005;55:601-7

3. Lettieri JT, Rogge MC, Kaiser L, Echols RM, Heller AH. Pharmacokinetic profiles of ciprofloxacin after single intravenous and oral doses. *Antimicrob Agents Chemother.* 1992;36:993-6
4. Koomanachai P, Bulik CC, Kuti JL, Nicolau DP. Pharmacodynamic modeling of intravenous antibiotics against gram-negative bacteria collected in the United States. *Clin Ther.* 2010;32(4):766-779. doi:10.1016/j.clinthera.2010.04.003
5. Dumitrescu TP, Anic-Milic T, Oreskovic K, Padovan J, Brouwer KLR, Zuo P, Schmith VD. Development of a population pharmacokinetic model to describe azithromycin whole-blood and plasma concentrations over time in healthy subjects. *Antimicrob Agents Chemother.* 2013;57:3194-3201. DOI: 10.1128/AAC.02430-12
6. Soda M, Ito S, Matsumaru N, et al. Evaluation of the microbiological efficacy of a single 2-gram dose of extended-release azithromycin by population pharmacokinetics and simulation in Japanese patients with gonococcal urethritis. *Antimicrob Agents Chemother.* 2017;62(1):e01409-17. doi:10.1128/AAC.01409-17
7. Chisholm SA, Mouton JW, Lewis DA, Nichols T, Ison CA, Livermore DM. Cephalosporin MIC creep among gonococci: time for a pharmacodynamic rethink? *J Antimicrob Chemother.* 2010;65:2141-8. doi: 10.1093/jac/dkq289.
8. Lettieri JT, Rogge MC, Kaiser L, Echols RM, Heller AH. Pharmacokinetic profiles of ciprofloxacin after single intravenous and oral doses. *Antimicrobial Agents and Chemotherapy.* 1992;36:993-6
9. Chisholm SA, Mouton JW, Lewis DA, Nichols T, Ison CA, Livermore DM. Cephalosporin MIC creep among gonococci: time for a pharmacodynamic rethink? *Journal of Antimicrobial Chemotherapy.* 2010;65:2141-8. doi: 10.1093/jac/dkq289.
10. Ibar-Bariain M, Rodríguez-Gascón A, Isla A, Solinís MA, Canut-Blasco A. Application of pharmacokinetic/pharmacodynamic analysis to evaluate the adequacy of antimicrobial therapy for pediatric acute otitis media in Spain before and after the introduction of the PCV7 vaccine. *Rev Esp Quimioter.* 2019;32(2):121-129
11. Asín E, Isla A, Canut A, Rodríguez Gascón A. Comparison of antimicrobial pharmacokinetic/pharmacodynamic breakpoints with EUCAST and CLSI clinical breakpoints for Gram-positive bacteria. *Int J Antimicrob Agents.* 2012;40(4):313-322. doi:10.1016/j.ijantimicag.2012.06.005.
